# Supplementary material for: Celastrol alleviates renal fibrosis by upregulating cannabinoid receptor 2 expression
Source: PubMed Central journal article supplement (PMC5964092; doi:10.1038/s41419-018-0666-y), 2018-05-22
Supplement: 41419_2018_666_MOESM1_ESM.pdf [file 41419_2018_666_MOESM1_ESM.pdf]

1 **Celastrol alleviates renal fibrosis by upregulating cannabinoid receptor 2**  
2 **expression**

3

4 Ming Tang<sup>1,2</sup>, Xu Cao<sup>1</sup>, Kun Zhang<sup>1</sup>, You Li<sup>1</sup>, Quan-you Zheng<sup>1</sup>, Gui-qing Li<sup>2</sup>,  
5 Qian-hui He<sup>1</sup>, Shu-jing Li<sup>1</sup>, Gui-lian Xu<sup>2,\*</sup>, and Ke-qin Zhang<sup>1,\*</sup>

6

7 <sup>1</sup>Department of Nephrology, Southwest Hospital, Army Medical University (Third  
8 Military Medical University), Chongqing 400038, China.

9 <sup>2</sup>Department of Immunology, Army Medical University (Third Military Medical  
10 University), Chongqing 400038, China.

11

12 \*Correspondence: Army Medical University (Third Military Medical University), 30  
13 Gaotanyan Main Street, Shapingba District, Chongqing 400038, PR China. E-mail:  
14 xuguilian@tmmu.edu.cn (G.-L.Xu); zhkq@tmmu.edu.cn (K.-Q. Zhang)

15

16 Running title: Celastrol improves renal fibrosis

17 **Supplementary information:**

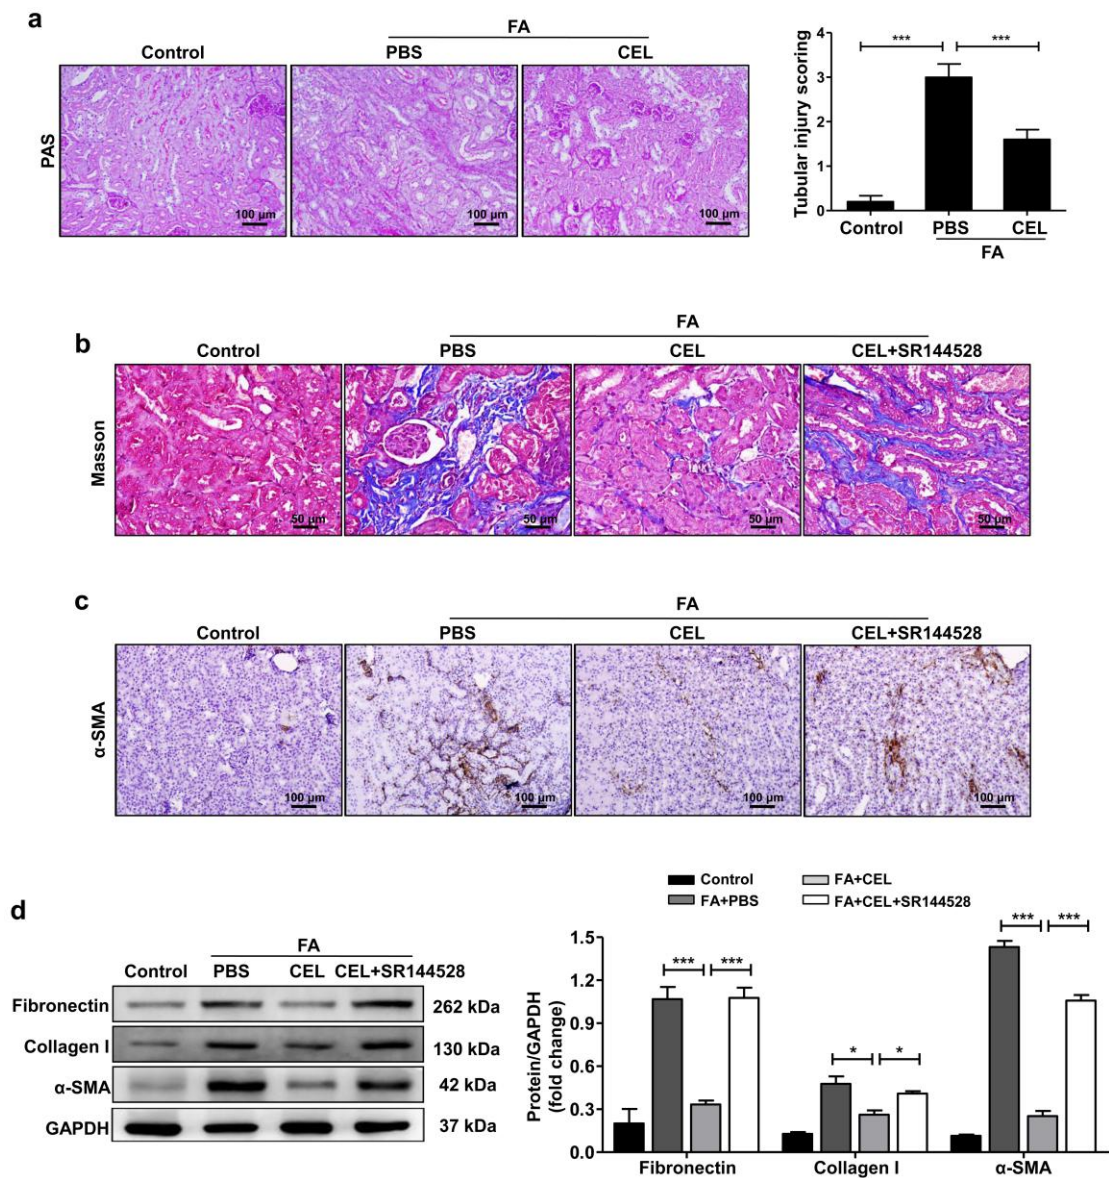

18

19 **Fig. S1 Celastrol attenuates FA-induced renal fibrosis.** Celastrol (1 mg/kg) and  
 20 SR144528 (1 mg/kg) were administered by intraperitoneal injections 3 days after FA  
 21 injection. The celastrol + SR144528 group was additionally pretreated with  
 22 SR144528 1 h before the celastrol injection. Both celastrol and SR144528 were  
 23 administered daily for 21 days, and then all mice were euthanized. The vehicle-treated  
 24 mice were treated with an equal volume of PBS. (a) PAS staining was used to show  
 25 tubular injury, and quantification of tubular injury scoring in different groups of mice

26 was presented. Scale bar = 100  $\mu$ m. (b) Masson's trichrome staining of kidney tissues  
27 sections. Scale bar = 50  $\mu$ m. (c) Representative micrographs of the expression of  
28  $\alpha$ -SMA in kidney tissues using immunohistochemical staining. Scale bar = 100  $\mu$ m. (d)  
29 Western blot analyses of fibronectin, collagen I, and  $\alpha$ -SMA protein in kidney tissues  
30 and quantitative data were presented. All values are represented as mean  $\pm$  SEM. n =  
31 5/group. \* $P$  < 0.05 and \*\*\* $P$  < 0.001.  
32

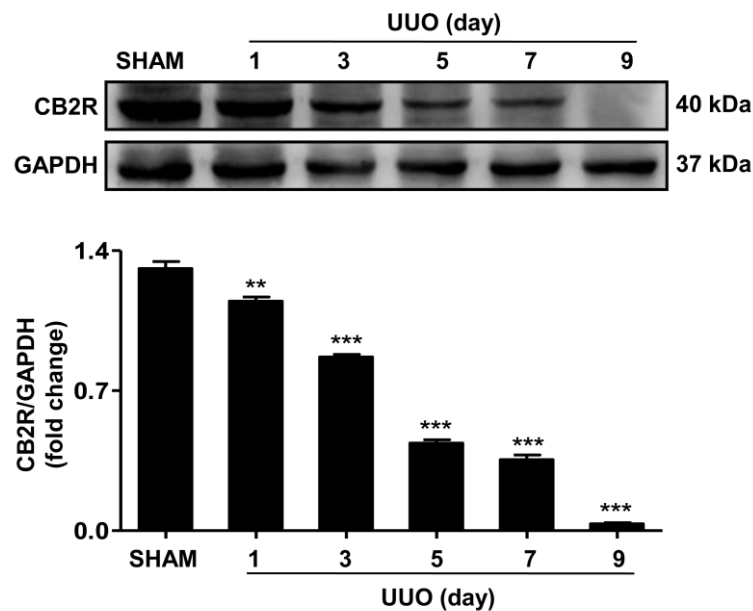

33  
34 **Fig. S2 CB2R expression in UUO-induced obstructed kidney tissues.** Mice were  
35 euthanized on days 1, 3, 5, 7, and 9 after UUO surgery. Sham group was the control  
36 for UUO. Western blot analyses of CB2R expression in the obstructed kidney tissue at  
37 the indicated time points and quantitative data were presented. \*\* $P$  < 0.01 and \*\*\* $P$  <  
38 0.001 versus sham group.  
39

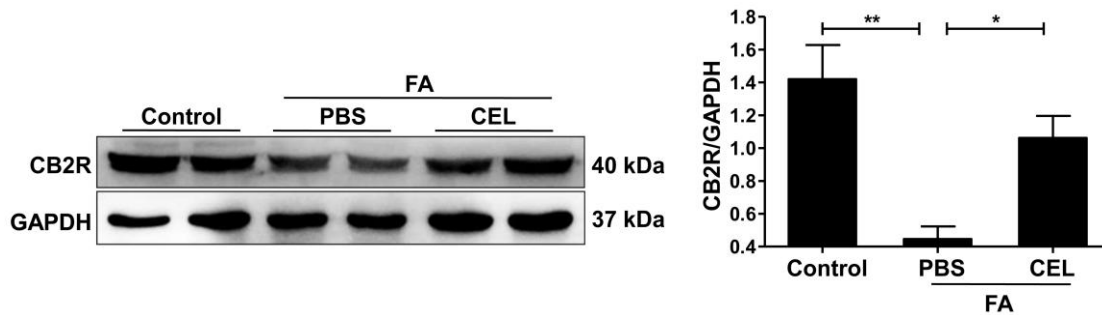

40

41 **Fig. S3 Effect of celastrol treatment on CB2R expression of FA-induced damaged**  
 42 **kidney tissues in mice.** Celastrol (1 mg/kg) was administered by intraperitoneal  
 43 injection 3 days after FA injection. Celastrol was administered daily for 21 days, and  
 44 then all mice were euthanized. The vehicle-treated mice were treated with an equal  
 45 volume of PBS. Western blot analyses of CB2R expression in FA-induced damaged  
 46 kidney tissues, and quantitative data were presented. All values are represented as  
 47 mean ± SEM. n = 5/group. \**P* < 0.05 and \*\**P* < 0.01.

48

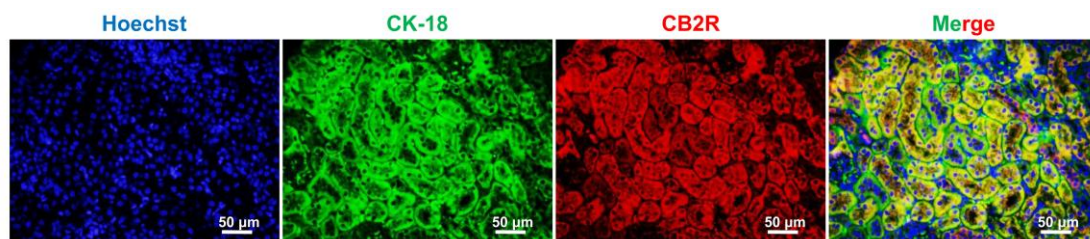

49

50 **Fig. S4 Expression of CB2R and CK-18 in kidney tissues.** Kidney tissues were  
 51 collected from sham group mice. The location of CB2R (red) and CK-18 (a marker of  
 52 epithelial cells, green) in kidney tissues was assayed by immunofluorescence. Scale  
 53 bar = 50 μm.

54

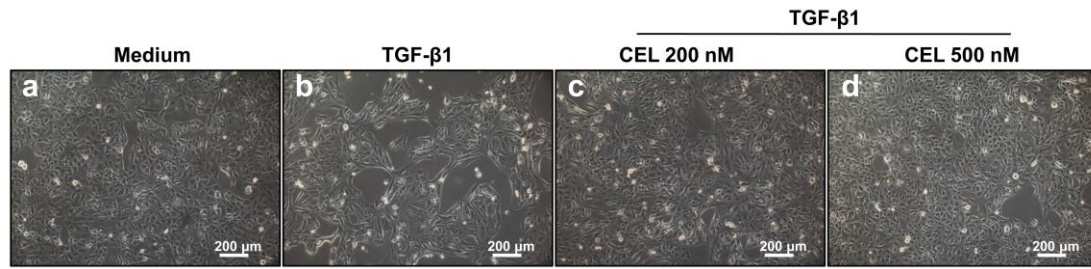

55

56 **Fig. S5 Effect of celastrol treatment on the morphology of TGF- $\beta$ 1- stimulated**

57 **HK-2 cells.** (a–d) Serum-starved HK-2 cells were preincubated with or without the

58 indicated amount of celastrol for 1 h, followed by stimulation with recombinant

59 murine TGF- $\beta$ 1 (10 ng/ml) for 48 h. The morphological changes of HK-2 cells were

60 observed by phase-contrast microscopy. The medium was used as the negative control

61 of TGF- $\beta$ 1 stimulation group. (a) Cells were polygonal or oval, and displayed the

62 typical cobblestone morphology of epithelial cells in the medium group. (b) After

63 TGF- $\beta$ 1 stimulation, cells lost the cell-to-cell connection, and exhibited a long spindle

64 fibroblast-like morphology. (c, d) Celastrol treatment partly reversed the TGF- $\beta$ 1

65 stimulation-induced morphological changes of HK2 cells. Results are representative of

66 three replicate experiments. Scale bar = 200  $\mu$ m.

67

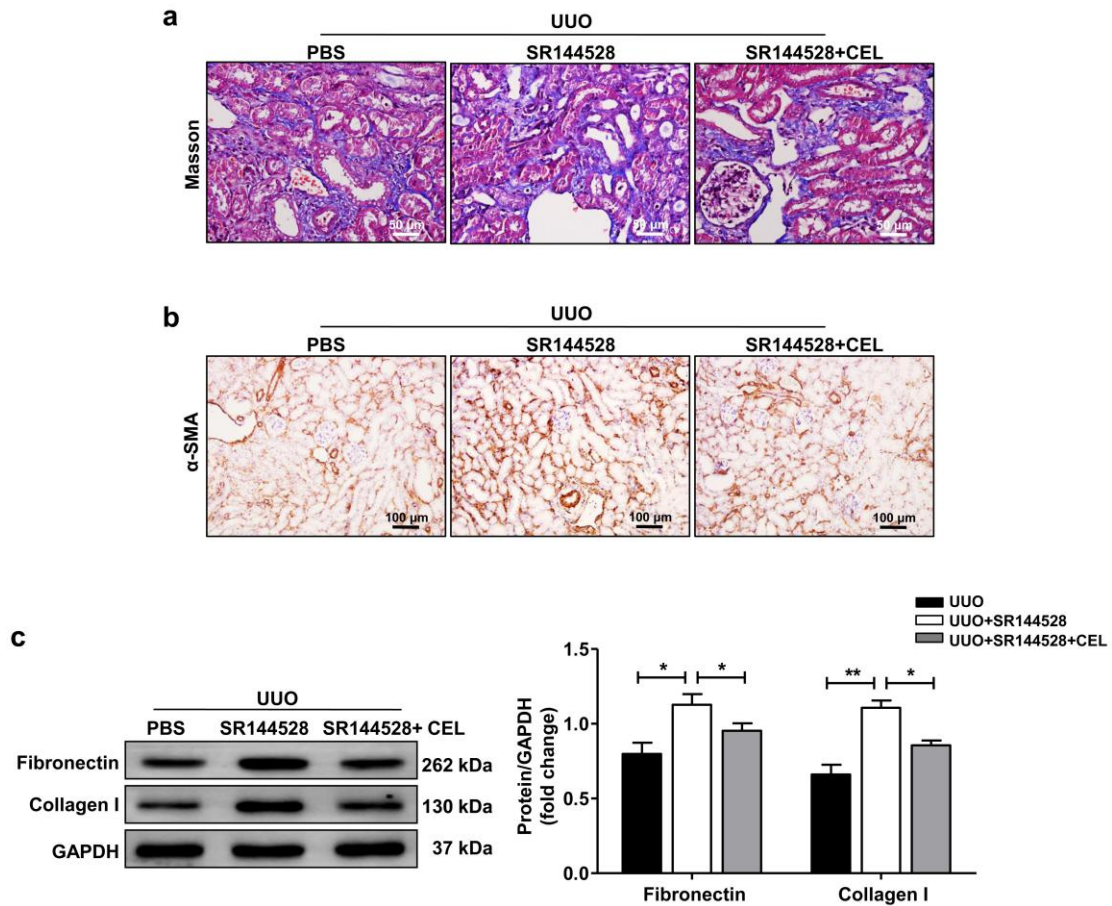

68

69 **Fig. S6 Effect of SR144528 treatment on UUO-induced renal fibrosis.** Mice

70 received SR144528 (1 mg/kg) daily for 7 d after UUO surgery, and PBS treatment

71 was used as the negative control. Kidney tissues were collected at 7 days after UUO.

72 (a) Masson's trichrome staining of kidney tissues sections. Bar = 50  $\mu$ m. (b)

73 Immunohistochemical staining of  $\alpha$ -SMA in kidney tissues. Bar = 100  $\mu$ m. (c)

74 Western blot analyses of fibronectin and collagen I expression in kidney tissues.

75 Quantitative data were presented at the right. All values are represented as mean  $\pm$

76 SEM. n = 5 /group. \* $P$  < 0.05 and \*\* $P$  < 0.01.

77

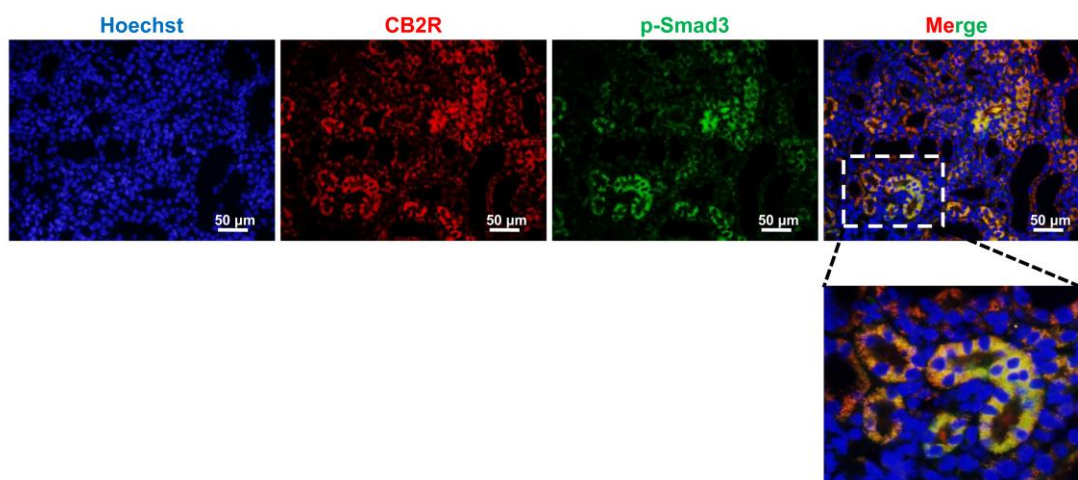

78

79 **Fig. S7 Expression of CB2R and p-Smad3 in kidney tissues.** Kidney tissues were  
 80 collected after UUO surgery for 7 days in mice. The location of p-Smad3 (green) and  
 81 CB2R (red) in kidney tissues was assayed by immunofluorescence. Scale bar = 50  
 82  $\mu\text{m}$ .

83

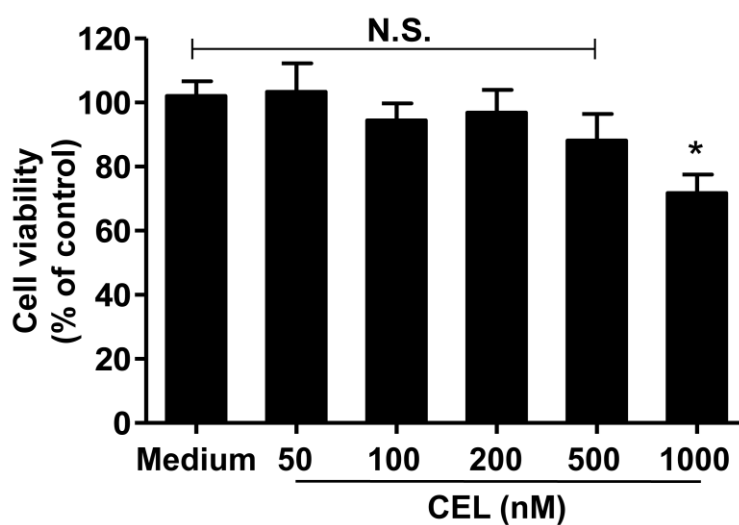

84

85 **Fig. S8 Effect of different concentrations of celastrol on the viability of HK-2**  
 86 **cells.** Serum-starved HK-2 cells were incubated with the indicated amount of celastrol  
 87 for 24 h, and then cytotoxicity of celastrol was assessed using CCK-8 assay. The  
 88 medium was used as the negative control of celastrol stimulation. Results are  
 89 representative of three replicate experiments. All values are represented as mean  $\pm$

90 SEM. N.S.: not significant. \* $P < 0.05$  versus medium group.

91

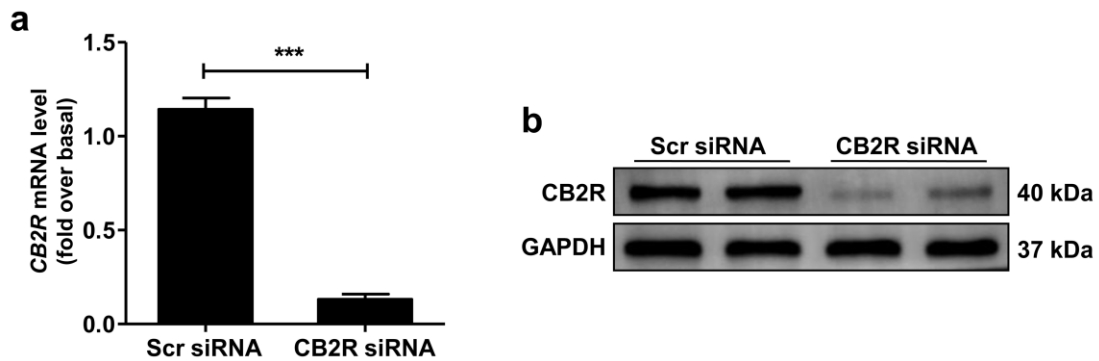

92

93 **Fig. S9 CB2R expression in RAW264.7 cells after treatment with CB2R siRNA.**

94 (a, b) Cells were collected after transfection with CB2R siRNA for 48 h. Scr siRNA

95 treatment was used as the negative control. The expression of CB2R was measured by

96 (a) qRT-PCR and (b) western blot. Results are representative of three replicate

97 experiments. All values are represented as mean  $\pm$  SEM. \*\*\* $P < 0.001$ .

98

99 **Supplementary Table S1. Sequences of primers for qRT-PCR.**

| Gene                           | Forward primer         | Reverse primer          |
|--------------------------------|------------------------|-------------------------|
| <i>TNF-<math>\alpha</math></i> | AGGCACTCCCCCAAAGATG    | TTTGCTACGACGTGGGCTAC    |
| <i>IL-1<math>\beta</math></i>  | TGCCACCTTTTGACAGTGATG  | AAGGTCCACGGGAAAGACAC    |
| <i>IL-6</i>                    | TAGTCCTTCTACCCCAATTTCC | TTGGTCCTTAGCCACTCCTTC   |
| <i>TGF-<math>\beta</math>1</i> | GACTCTCCACCTGCAAGACC   | GGACTGGCGAGCCTTAGTTT    |
| <i>Col1</i>                    | TAAGGGTCCCCAATGGTGAGA  | GGGTCCCTCGACTCCTACAT    |
| <i>Vim</i>                     | TGCCGTTGAAGCTGCTAACTA  | CCAGAGGGAGTGAATCCAGATTA |
| <i>CB2R</i>                    | TTGCAGGACAGCATAACCC    | CAGTGCCACAGTGTCTTGC     |



*GAPDH*

CTCTGCTCCTCCTGTTTCGAC

GCGCCCAATACGACCAAATC

---

100
